# Supplementary material for: A mechanical nanogate based on a carbon nanotube for reversible control of ion conduction
Source: Royal Society of Chemistry journal article supplement (doi:10.1039/c3nr06238d), 2014-01-01
Supplement: c3nr06238d.pdf [file c3nr06238d.pdf]

# **A mechanical nanogate based on a carbon nanotube for reversible control of ion conduction**

Zhongjin He,<sup>a</sup> Ben Corry,<sup>b</sup> Xiaohua Lu<sup>c</sup> and Jian Zhou<sup>\*a</sup>

<sup>a</sup>School of Chemistry and Chemical Engineering, South China University of Technology,  
Guangzhou, Guangdong 510640, China

<sup>b</sup>Research School of Biology, The Australian National University, Canberra ACT 0200, Australia

<sup>c</sup>State Key Laboratory of Materials-oriented Chemical Engineering, Nanjing University of  
Technology, Nanjing 210009, China

\*Corresponding Author: E-mail: [jianzhou@scut.edu.cn](mailto:jianzhou@scut.edu.cn)

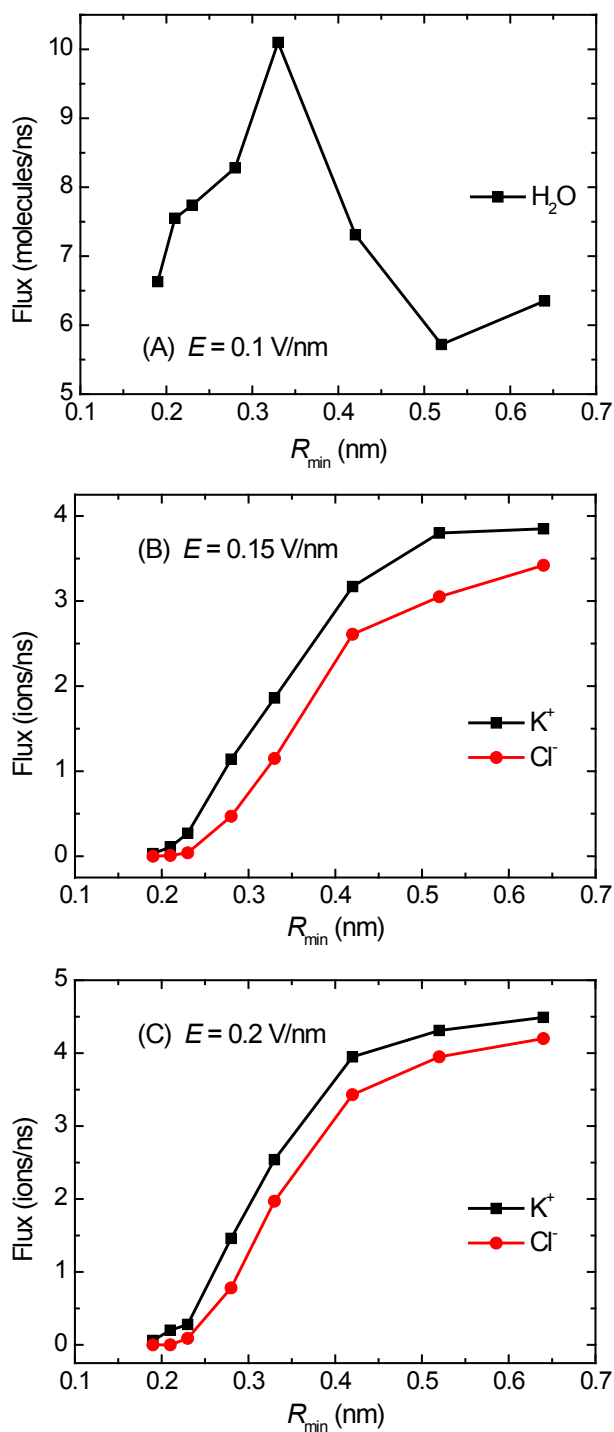

**Figure S1.** Water flux through CNT(12,12) with different deformation under  $E = 0.1$  V/nm (A). Ionic flux of  $\text{K}^+$  and  $\text{Cl}^-$  through CNT(12,12) with different deformation under  $E = 0.15$  V/nm (B) and  $E = 0.2$  V/nm (C).  $R_{\min}$  is the effective radius of the constriction.
